# Supplementary material
Source: PubMed Central journal article supplement (PMC6731401)
Supplement: ajtr0011-4881-f7.pdf [file ajtr0011-4881-f7.pdf]

DHX9 inhibits epithelial-mesenchymal transition in human lung adenocarcinoma

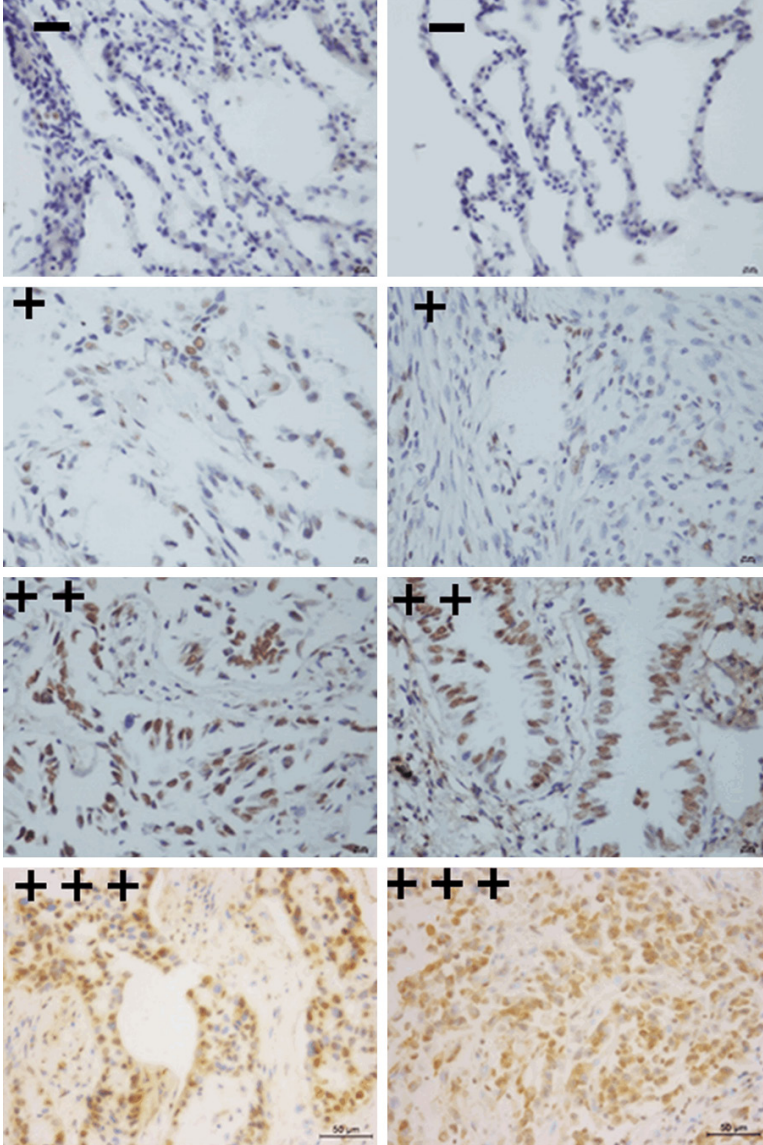

**Figure S1.** All collected tumor tissues were immunostained with a monoclonal anti-DHX9 antibody. Representative images of DHX9-negative (-: positive cell ratio was 0% to 10%), DHX9 weakly positive (+: positive cell ratio was 11% to 30%), DHX9-positive (+: positive cell ratio was 31% to 70%), and DHX9 strongly positive (+++: positive cell ratio was 71% to 100%) were shown.
